# Supplementary material
Source: PubMed Central journal article supplement (PMC2573388)
Supplement: NIHMS65062-supplement.pdf [file NIHMS65062-supplement.pdf]

situations has been demonstrated.<sup>10,49</sup> Real-time flow analysis may also help to reduce the large sample-to-sample variability (Table 1). Finally, this study suggests the possibility of combining photolabile protecting group chemistry and nanoarray technology to spatially direct and monitor the synthesis of combinatorial peptide libraries and subsequently detect molecular biorecognition events in a label-free format. Our future studies will focus on spot arraying the aminosilane linker to demonstrate arrayed peptide synthesis followed by combinatorial oligopeptide receptor synthesis and detection.

**Acknowledgment.** We acknowledge Pete Gareiss, Brian McNaughton, Nate Ross, Charles Mace, and Ben Miller for

---

(49) Dancil, K.-P. S.; Greiner, D. P.; Sailor, M. J. *J. Am. Chem. Soc.* **1999**, *121*, 7925–7930.

helpful discussions regarding solid-phase synthesis and Stacy Jacobs for help with cell culture experiments. This work was partially supported by the National Institutes of Health (NIH) National Institute of Allergy and Infectious Diseases (grant 5K25AI060884).

**Supporting Information Available:** Optical sensor response following a series of coupling steps. Magnitude of the red shift following exposure of an APTMS-treated PSi surface. Effect of sequential amino acid coupling on the magnitude of the average optical red shift. Bright-field and total ion SIMS images and ion intensity maps. Fluorescence micrographs of the PSi/wafer interface. This material is available free of charge via the Internet at <http://pubs.acs.org>.

LA703053H
